# Supplementary material for: Microbial Inhibition by UV Radiation Combined with Nisin and Shelf-Life Extension of Tangerine Juice during Refrigerated Storage
Source: MDPI journal article supplement (doi:10.3390/foods12142725), 2023-07-17
Supplement: s1 [file s1]

**Table S1.** Total plate counts, yeast and mold counts, and pathogenic microbial counts of orange juice samples subjected to different doses of UV-radiation.

| UV-treatments               | Total plate count<br>(log CFU/mL) |                  | Yeast and mold count<br>(log CFU/mL) |                  | <i>E. coli</i><br>(log CFU/mL) |                  | <i>L. plantarum</i><br>(log CFU/mL) |                  | <i>S. cerevisiae</i><br>(log CFU/mL) |                  |
|-----------------------------|-----------------------------------|------------------|--------------------------------------|------------------|--------------------------------|------------------|-------------------------------------|------------------|--------------------------------------|------------------|
|                             | Population                        | log<br>reduction | Population                           | log<br>reduction | Population                     | log<br>reduction | Population                          | log<br>reduction | Population                           | log<br>reduction |
| UV 4.68 J/cm <sup>2</sup>   | 6.49±0.07 <sup>a</sup>            | 0.32±0.02        | 6.91±0.03 <sup>a</sup>               | 0.07±0.05        | 5.76±0.04 <sup>a</sup>         | 0.31±0.03        | 6.52±0.05 <sup>a</sup>              | 0.13±0.04        | 6.29±0.07 <sup>a</sup>               | 0.04±0.01        |
| UV 9.36 J/cm <sup>2</sup>   | 6.29±0.07 <sup>ab</sup>           | 0.53±0.02        | 6.78±0.01 <sup>ab</sup>              | 0.21±0.02        | 5.64±0.04 <sup>ab</sup>        | 0.43±0.03        | 6.33±0.07 <sup>ab</sup>             | 0.33±0.02        | 6.19±0.07 <sup>ab</sup>              | 0.14±0.02        |
| UV 18.72 J/cm <sup>2</sup>  | 5.92±0.03 <sup>b</sup>            | 0.89±0.13        | 6.52±0.06 <sup>b</sup>               | 0.47±0.03        | 5.45±0.01 <sup>b</sup>         | 0.64±0.25        | 6.02±0.04 <sup>b</sup>              | 0.64±0.13        | 5.94±0.03 <sup>b</sup>               | 0.39±0.00        |
| UV 37.44 J/cm <sup>2</sup>  | 5.55±0.08 <sup>c</sup>            | 1.26±0.01        | 5.99±0.01 <sup>c</sup>               | 1.00±0.02        | 5.32±0.05 <sup>c</sup>         | 0.77±0.22        | 5.53±0.36 <sup>c</sup>              | 1.12±0.45        | 5.50±0.08 <sup>c</sup>               | 0.85±0.03        |
| UV 74.88 J/cm <sup>2</sup>  | 5.01±0.04 <sup>d</sup>            | 1.81±0.05        | 5.54±0.10 <sup>d</sup>               | 1.44±0.08        | 4.79±0.01 <sup>d</sup>         | 1.29±0.11        | 4.97±0.015 <sup>d</sup>             | 1.69±0.11        | 4.87±0.04 <sup>d</sup>               | 1.47±0.16        |
| UV 149.76 J/cm <sup>2</sup> | 4.26±0.05 <sup>e</sup>            | 2.56±0.04        | 4.94±0.00 <sup>e</sup>               | 2.05±0.02        | 3.11±0.03 <sup>e</sup>         | 2.97±0.46        | 4.16±0.022 <sup>e</sup>             | 2.49±0.07        | 4.23±0.05 <sup>e</sup>               | 2.10±0.21        |

The values in the table represent the mean ± standard deviation of UV treated orange juice obtained from the 3 replicates. <sup>ae</sup> indicating significant difference in each column ( $p \leq 0.05$ ) of the microbial experiment. UV: ultraviolet radiation doses (J/cm<sup>2</sup>).

**Table S2.** Total microbial and yeast and mold counts, and microbial counts of orange juice samples subjected to different levels of nisin.

| Nisin<br>(ppm) | Total plate count<br>(log CFU/mL) |                  | Yeast and mold count<br>(log CFU/mL) |                  | <i>E. coli</i><br>(log CFU/mL) |                  | <i>L. plantarum</i><br>(log CFU/mL) |                  | <i>S. cerevisiae</i><br>(log CFU/mL) |                  |
|----------------|-----------------------------------|------------------|--------------------------------------|------------------|--------------------------------|------------------|-------------------------------------|------------------|--------------------------------------|------------------|
|                | Population                        | log<br>reduction | Population                           | log<br>reduction | Population                     | log<br>reduction | Population                          | log<br>reduction | Population                           | log<br>reduction |
| 50             | 4.92±0.13 <sup>a</sup>            | 0.85 ±0.02       | 7.40±0.08 <sup>a</sup>               | 0.06±0.02        | 6.80±0.11 <sup>a</sup>         | 0.47±0.27        | 5.59±0.10 <sup>a</sup>              | 0.69±0.18        | 7.30±0.01 <sup>a</sup>               | 0.05±0.05        |
| 100            | 4.64±0.02 <sup>b</sup>            | 1.14±0.08        | 7.32±0.05 <sup>a</sup>               | 0.14±0.05        | 6.31±0.24 <sup>ab</sup>        | 0.96±0.14        | 4.14±0.09 <sup>b</sup>              | 2.13±0.17        | 7.23±0.05 <sup>ab</sup>              | 0.12±0.01        |
| 150            | 4.18±0.15 <sup>c</sup>            | 1.59±0.04        | 7.26±0.04 <sup>ab</sup>              | 0.19±0.06        | 6.02±0.20 <sup>b</sup>         | 1.25±0.19        | 3.84±0.04 <sup>c</sup>              | 2.43±0.04        | 7.21±0.05 <sup>ab</sup>              | 0.14±0.00        |
| 200            | 3.66±0.16 <sup>d</sup>            | 2.12±0.05        | 6.23±0.04 <sup>b</sup>               | 0.23±0.06        | 5.72±0.27 <sup>b</sup>         | 1.55±0.11        | 3.23±0.01 <sup>d</sup>              | 3.05±0.07        | 7.17±0.02 <sup>b</sup>               | 0.18±0.04        |

The values in the table represent the mean ± standard deviation of nisin (ppm) treated orange juice obtained from the 3 replicates. <sup>a-d</sup> indicating significant difference in each column ( $p \leq 0.05$ ) of the microbial experiment.

**Table S3.** Physiochemical characteristics of orange juice subjected to different doses of UV-radiation and nisin.

| Properties  | UV treatments             |                           |                            |                            |                           |                          | Nisin (ppm)               |                           |                            |                           |
|-------------|---------------------------|---------------------------|----------------------------|----------------------------|---------------------------|--------------------------|---------------------------|---------------------------|----------------------------|---------------------------|
|             | 4.68 J/cm <sup>2</sup>    | 9.36 J/cm <sup>2</sup>    | 18.72 J/cm <sup>2</sup>    | 37.44 J/cm <sup>2</sup>    | 74.88 J/cm <sup>2</sup>   | 149.76 J/cm <sup>2</sup> | 50                        | 100                       | 150                        | 200                       |
| pH          | 3.87±0.01 <sup>a</sup>    | 3.87±0.01 <sup>a</sup>    | 3.87±0.01 <sup>a</sup>     | 3.87±0.01 <sup>a</sup>     | 3.87±0.01 <sup>a</sup>    | 3.87±0.01 <sup>a</sup>   | 3.87±0.004 <sup>a</sup>   | 3.87±0.003 <sup>a</sup>   | 3.87±0.005 <sup>a</sup>    | 3.86±0.005 <sup>a</sup>   |
| TSS         | 9.0±0.01 <sup>a</sup>     | 9.0±0.03 <sup>a</sup>     | 9.0±0.01 <sup>a</sup>      | 9.0±0.01 <sup>a</sup>      | 9.0±0.01 <sup>a</sup>     | 9.0±0.01 <sup>a</sup>    | 8.8±0.014 <sup>a</sup>    | 8.7±0.060 <sup>a</sup>    | 8.7±0.011 <sup>a</sup>     | 8.7±0.018 <sup>a</sup>    |
| TA          | 0.42±0.02 <sup>a</sup>    | 0.42±0.01 <sup>a</sup>    | 0.42±0.01 <sup>a</sup>     | 0.42±0.01 <sup>a</sup>     | 0.42±0.02 <sup>a</sup>    | 0.42±0.02 <sup>a</sup>   | 0.45±0.01 <sup>a</sup>    | 0.45±0.01 <sup>a</sup>    | 0.45±0.01 <sup>a</sup>     | 0.45±0.01 <sup>a</sup>    |
| L*          | 71.94±0.04 <sup>a</sup>   | 71.91±0.06 <sup>a</sup>   | 71.89±0.06 <sup>a</sup>    | 71.87±0.05 <sup>a</sup>    | 71.83±0.05 <sup>a</sup>   | 71.81±0.06 <sup>a</sup>  | 71.96±0.03 <sup>a</sup>   | 71.91 ±0.05 <sup>a</sup>  | 71.95±0.01 <sup>a</sup>    | 71.95±0.02 <sup>a</sup>   |
| a*          | 11.86±0.06 <sup>ab</sup>  | 11.90±0.05 <sup>a</sup>   | 11.96±0.09 <sup>a</sup>    | 12.00±0.12 <sup>a</sup>    | 12.05±0.12 <sup>a</sup>   | 12.11±0.12 <sup>a</sup>  | 11.80±0.08 <sup>ab</sup>  | 11.81±0.09 <sup>ab</sup>  | 11.82±0.09 <sup>ab</sup>   | 11.82±0.10 <sup>ab</sup>  |
| b*          | 74.12±0.04 <sup>a</sup>   | 74.00±0.08 <sup>a</sup>   | 73.93±0.17 <sup>a</sup>    | 73.80±0.27 <sup>ab</sup>   | 73.78±0.27 <sup>ab</sup>  | 73.70±0.28 <sup>ab</sup> | 74.26±0.02 <sup>a</sup>   | 74.26±0.05 <sup>a</sup>   | 74.27±0.02 <sup>a</sup>    | 74.27±0.04 <sup>a</sup>   |
| TPC         | 188.08±11.85 <sup>a</sup> | 176.00±10.04 <sup>b</sup> | 165.48±13.74 <sup>c</sup>  | 160.06±10.50 <sup>bc</sup> | 153.61±8.12 <sup>c</sup>  | 146.50±1.57 <sup>d</sup> | 175.85±4.82 <sup>b</sup>  | 175.63±5.05 <sup>b</sup>  | 175.13±4.90 <sup>b</sup>   | 174.88±4.93 <sup>b</sup>  |
| TFC         | 180.74±5.21 <sup>b</sup>  | 178.48±5.75 <sup>bc</sup> | 176.51±5.67 <sup>abc</sup> | 174.91±5.44 <sup>bc</sup>  | 172.16±3.19 <sup>c</sup>  | 169.23±3.77 <sup>d</sup> | 202.30±4.37 <sup>a</sup>  | 199.30±5.80 <sup>a</sup>  | 198.04±5.69 <sup>a</sup>   | 197.35±4.62 <sup>ab</sup> |
| Vitamin C   | 39.99±2.93 <sup>ab</sup>  | 39.16±3.72 <sup>ab</sup>  | 38.55±3.31 <sup>ab</sup>   | 37.73±3.80 <sup>b</sup>    | 37.33±3.54 <sup>b</sup>   | 34.83±1.58 <sup>c</sup>  | 41.35±0.11 <sup>a</sup>   | 41.19±0.19 <sup>a</sup>   | 41.24±0.19 <sup>a</sup>    | 41.11±0.45 <sup>a</sup>   |
| Carotenoids | 12.71±0.49 <sup>b</sup>   | 13.70±0.37 <sup>ab</sup>  | 14.82±0.77 <sup>ab</sup>   | 15.68±0.14 <sup>a</sup>    | 15.92±0.32 <sup>a</sup>   | 16.21±0.12 <sup>a</sup>  | 16.18±0.06 <sup>a</sup>   | 16.05±0.09 <sup>a</sup>   | 16.02±0.09 <sup>a</sup>    | 15.95±0.11 <sup>a</sup>   |
| DPPH        | 347.82±3.09 <sup>a</sup>  | 338.36±7.71 <sup>b</sup>  | 337.36±7.84 <sup>bc</sup>  | 335.73±7.07 <sup>bc</sup>  | 333.00±8.61 <sup>bc</sup> | 328.36±2.31 <sup>c</sup> | 338.45±12.21 <sup>b</sup> | 337.82±12.1 <sup>bc</sup> | 336.91±12.34 <sup>bc</sup> | 336.00±12.1 <sup>bc</sup> |
| FRAP        | 355.04±7.07 <sup>a</sup>  | 351.88±7.07 <sup>ab</sup> | 344.95±6.45 <sup>b</sup>   | 340.82±7.32 <sup>bc</sup>  | 328.54±6.57 <sup>c</sup>  | 317.49±3.60 <sup>d</sup> | 346.44±1.86 <sup>bc</sup> | 345.30±2.48 <sup>ab</sup> | 344.42±2.73 <sup>b</sup>   | 343.11±1.36 <sup>bc</sup> |

The values in the table represent the mean ± standard deviation of UV treated orange juice obtained from the 3 replicates. Values with different letters in the same row (a, b, c, d) are significantly different ( $p \leq 0.05$ ).

TSS: Total soluble solid (°Brix); TA: Titratable acidity (% malic acid); TPC: Total phenolic compound (mg GAE/L); TFC: Total flavonoid content (mg QE/L); Total Carotenoid (µg /100 mL); DPPH assay (mM TE/100 mL); FRAP assay (mM TE/100 mL).
